# Supplementary material for: Metal Oxide Nanolayer-Decorated Epitaxial Graphene: A Gas Sensor Study
Source: Nanomaterials (Basel). 2020 Oct 30;10(11):2168. doi: 10.3390/nano10112168 (PMC7716239; doi:10.3390/nano10112168)
Supplement: Supplementary file 1 [file nanomaterials-10-02168-s001.docx]

Supplementary Material

Metal Oxide Nanolayer-Decorated Epitaxial Graphene: A Gas Sensor Study

Marius Rodner 1, Adam Icardi 1, Margus Kodu 2, Raivo Jaaniso 2, Andreas Schütze 3 and Jens Eriksson 1,*

1 Applied Sensor Science Unit, IFM, Linköping University, 58183 Linköping, Sweden; marius.rodner@liu.se (M.R.); adaic903@student.liu.se (A.I.)

2 Institute of Physics, University of Tartu, 50411 Tartu, Estonia; margus.kodu@ut.ee (M.K.), raivo.jaaniso@ut.ee (R.J.)

3 Department of Systems Engineering, Lab for Measurement Technology, Saarland University, 66123 Saarbrücken, Germany; schuetze@lmt.uni-saarland.de

***** Correspondence: jens.eriksson@liu.se; Tel.: +46-(0)-13-286-613

Table S1 summarizes the changes of baseline resistance for all four sensors depending on a change in relative humidity in the ambient. It can be clearly seen that a change from any level of relative humidity to one that is not zero, the change in baseline resistance is rather small and sometimes not even observable (e.g. V2O5 and ZrO2 when changing from 60 to 40% RH). A change from 20 to 0% RH[[1]](#footnote-1) on the other hand, has a rather large impact on the baseline resistance, which changes for about 3–4.5%. Only the ZrO2 decorated EG sensor shows almost no change in baseline resistance, but this is most probably due to that it is operated at 125 °C and not at 75 °C as all the other sensors. In general, a reduction in relative humidity can be seen as some kind of n-type doping, as water itself is a p-dopant and an introduction of more water would therefore be p-doping. Accordingly, CuO and V2O5 decorated EG (as p-type sensors) experience a decrease in resistance when decreasing the relative humidity, and Fe3O4 and ZrO2 decorated EG (as n-type sensors) react inversely. This is in agreement with the findings of measurements with NH3 as a reducing gas where the sensor responses are exactly opposite of what happens when decreasing the relative humidity.

**Table S1.** Summary of changes of baseline resistance when varying relative humidity in the ambient at 75 °C (except ZrO2 at 125 °C).

|  | **Baseline change** | | |
| --- | --- | --- | --- |
|  | **Relative humidity (%)** | **Absolute change (Ω)** | **Relative change (%)** |
| **CuO** | 60 to 40 | −2.6 | −0.06 |
| 40 to 20 | −7.8 | −0.18 |
| 20 to 0 | −197.2 | −4.54 |
| **Fe3O4** | 60 to 40 | 6.5 | 0.12 |
| 40 to 20 | 18.1 | 0.34 |
| 20 to 0 | 228.5 | 4.26 |
| **V2O5** | 60 to 40 | / | / |
| 40 to 20 | −66.4 | −0.58 |
| 20 to 0 | −365.0 | −3.18 |
| **ZrO2** | 60 to 40 | / | / |
| 40 to 20 | 2.1 | 0.10 |
| 20 to 0 | 1.0 | 0.05 |

1. < 5 ppm H2O for gas from gas bottles (6.0) and < 63.2 ppm for gas from a 0-air generator (see Section 3.3) [↑](#footnote-ref-1)
